# Supplementary material for: SLC43A2 and NFκB signaling pathway regulate methionine/cystine restriction-induced ferroptosis in esophageal squamous cell carcinoma via a feedback loop
Source: PubMed Central journal article supplement (PMC10238427; doi:10.1038/s41419-023-05860-7), 2023-06-03

Fig. 3E

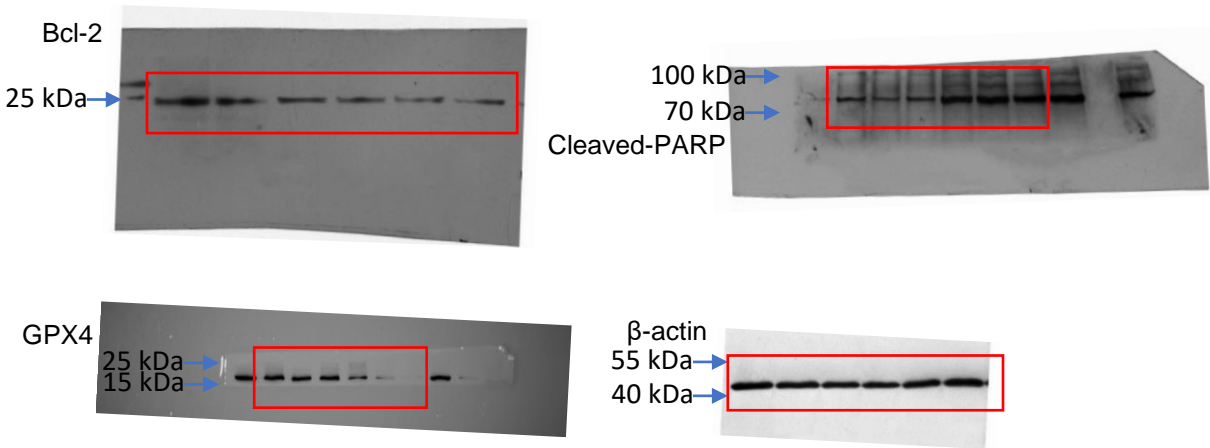

Fig. 4E

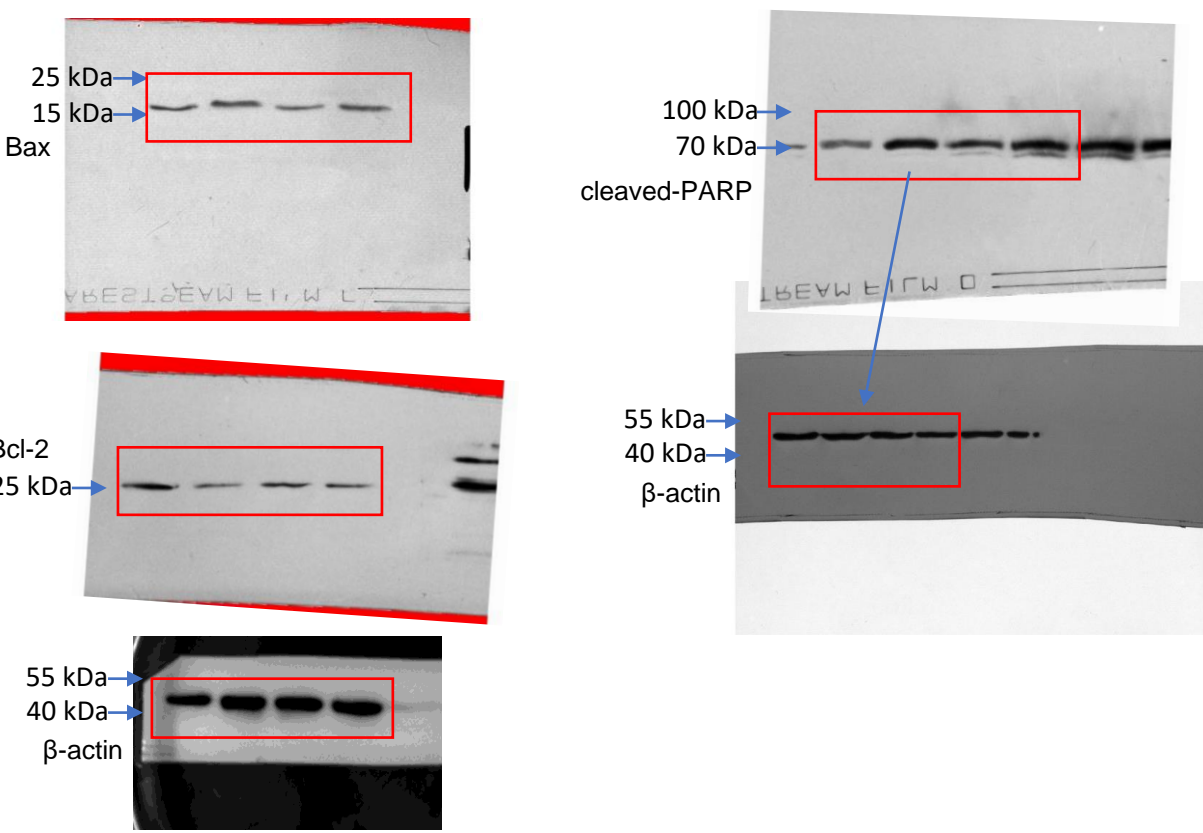

Fig. 4J

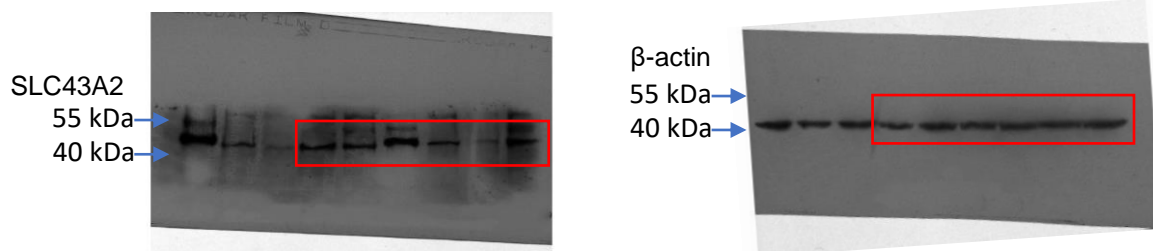

Fig. 4K

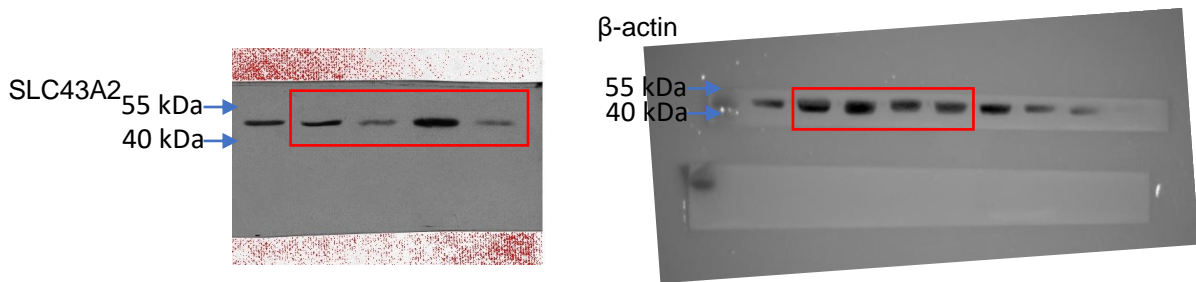

Fig. 5A

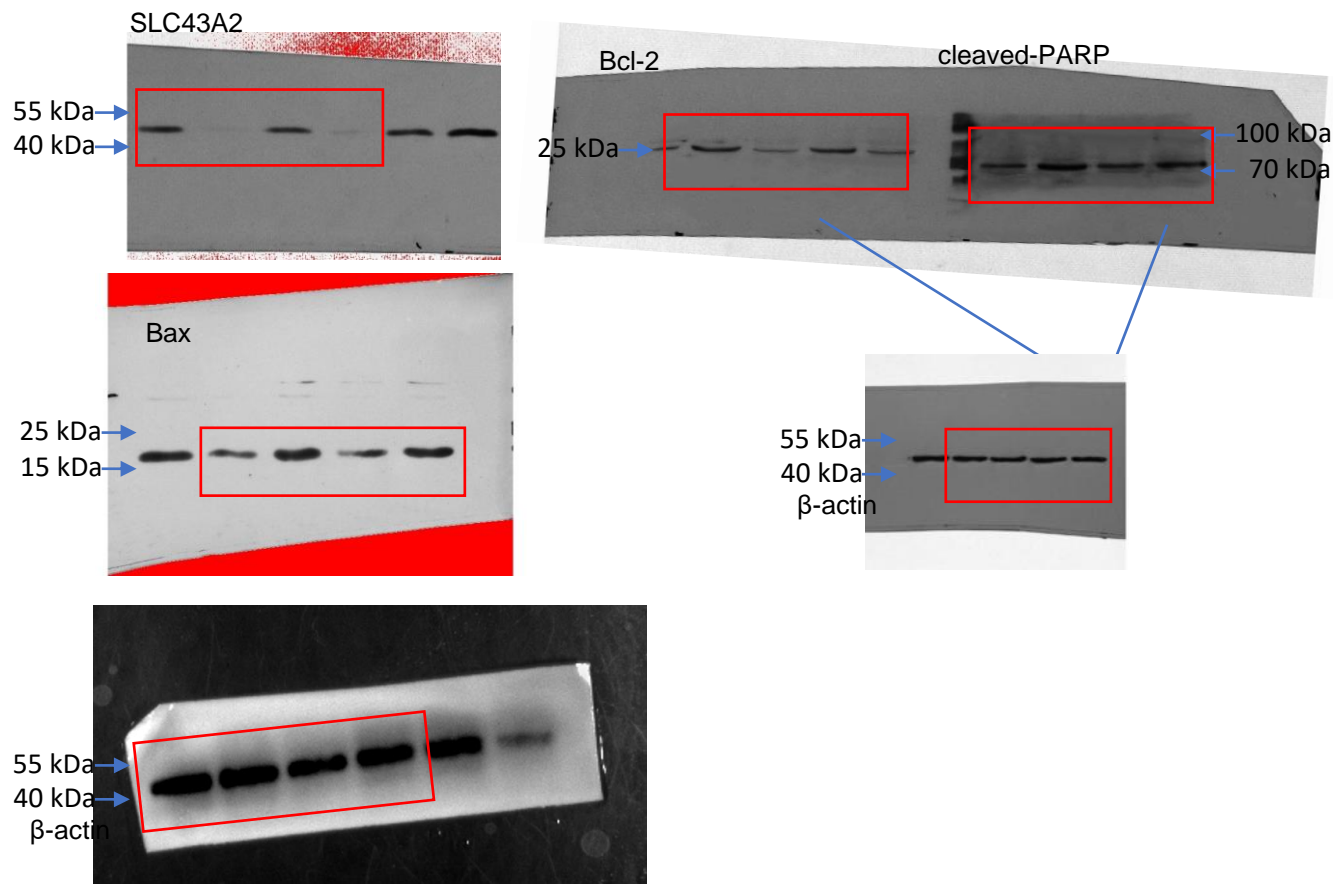

Fig. 5E

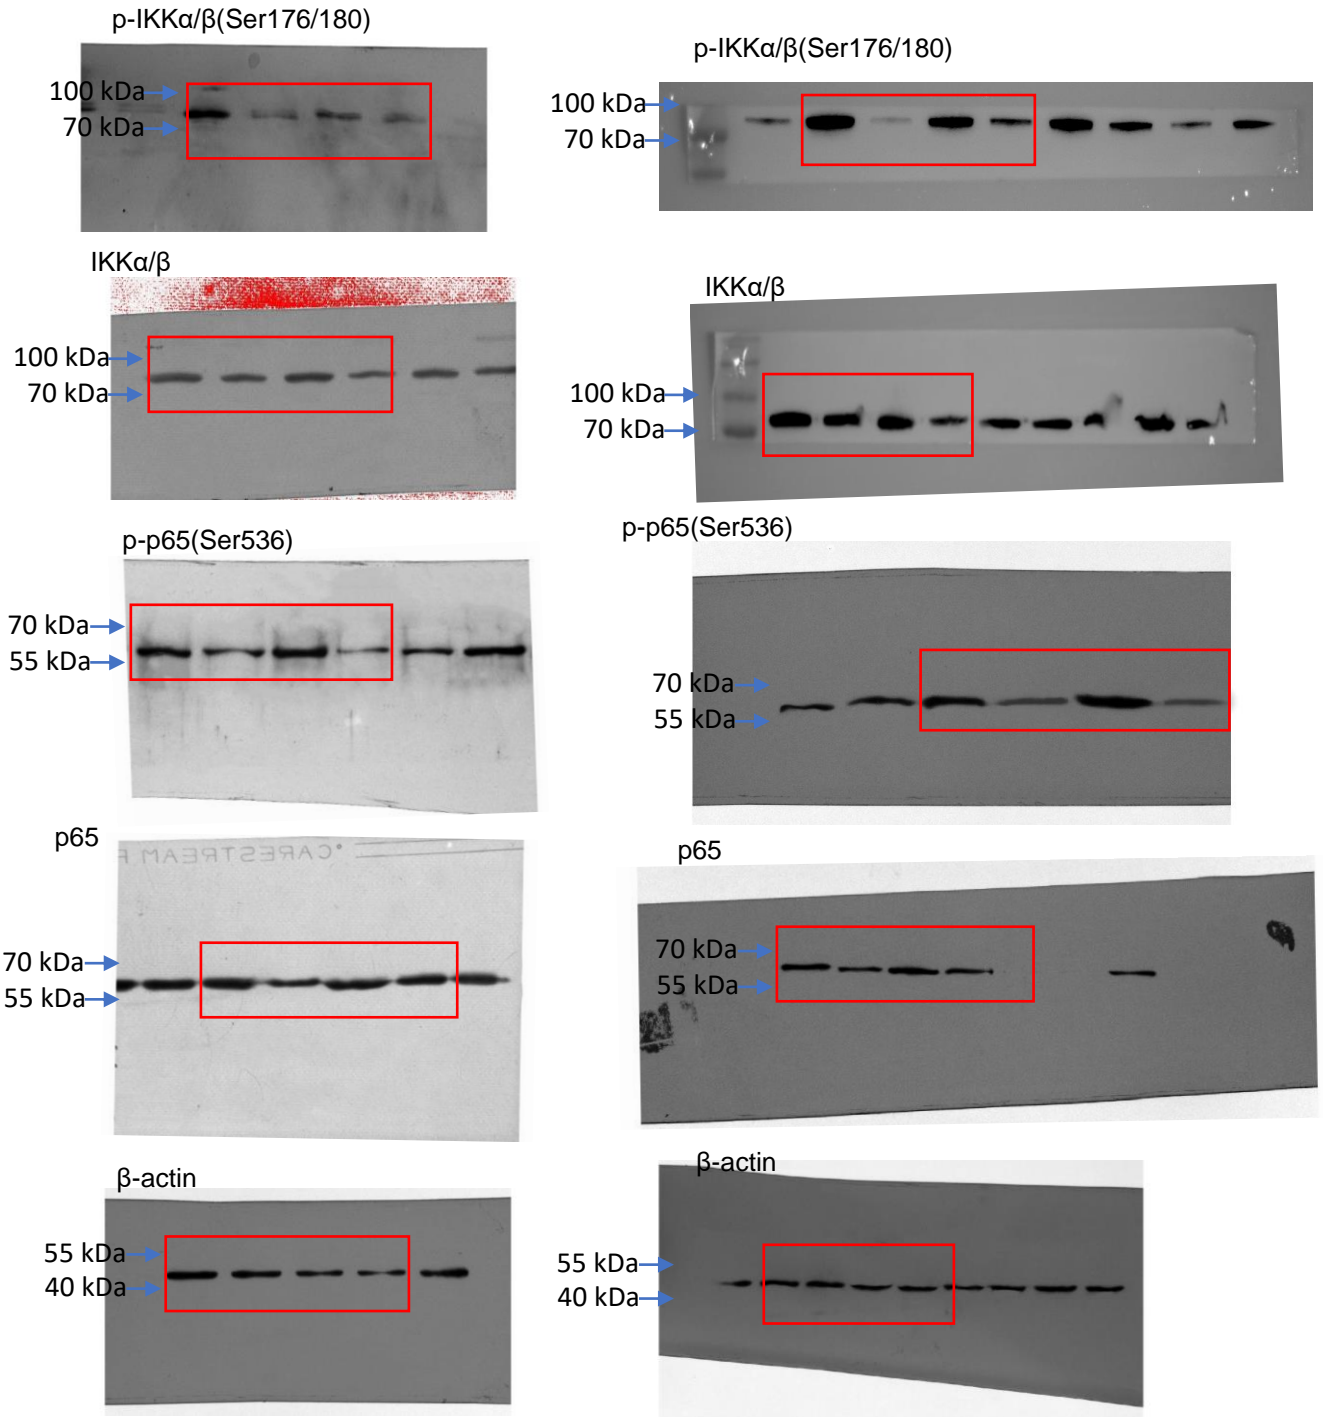

Fig. 5F

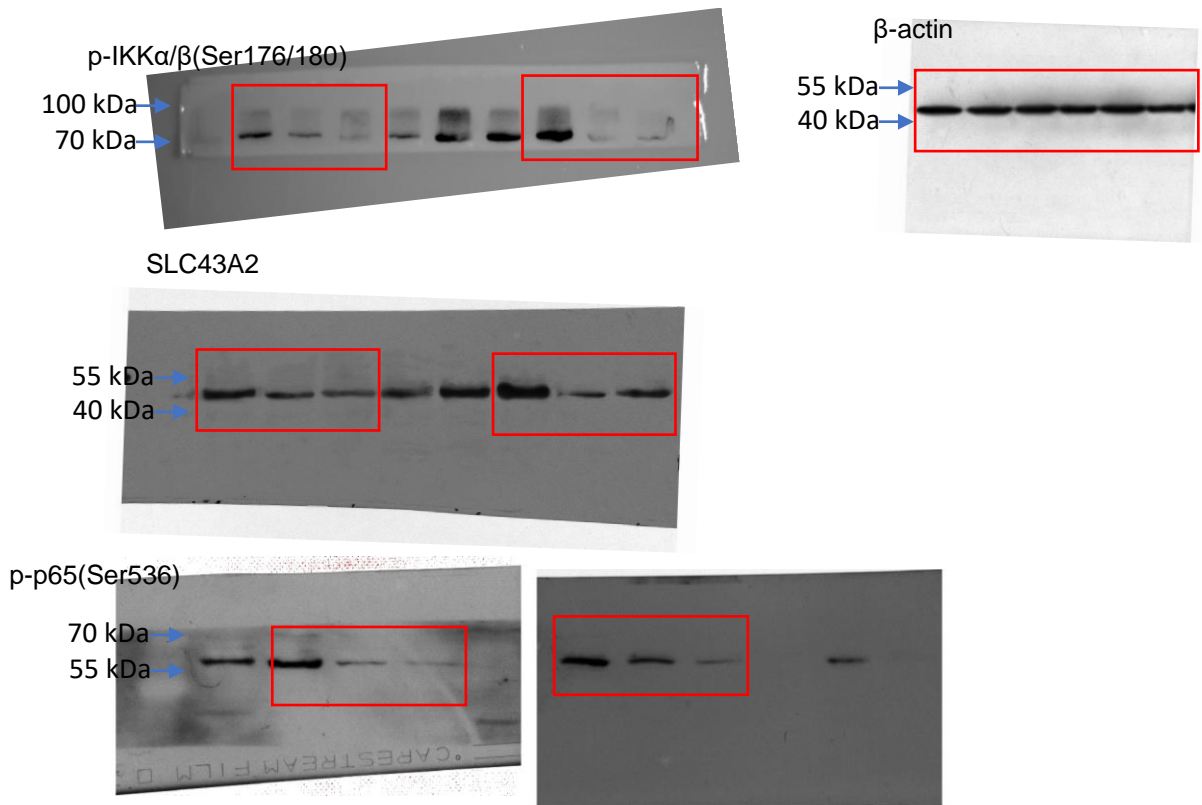

Fig. 6I

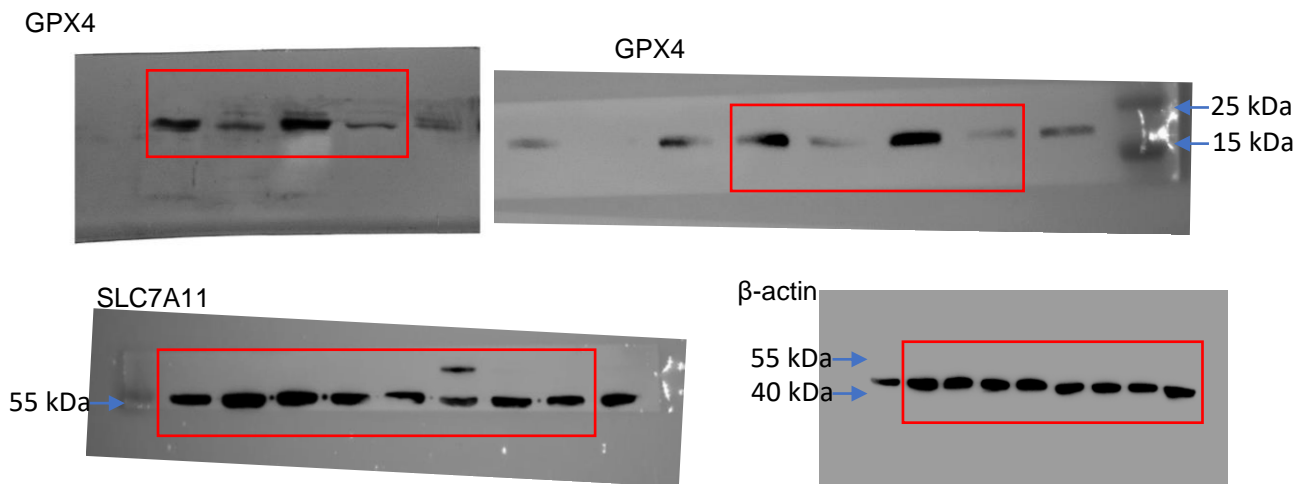

Fig. 6J

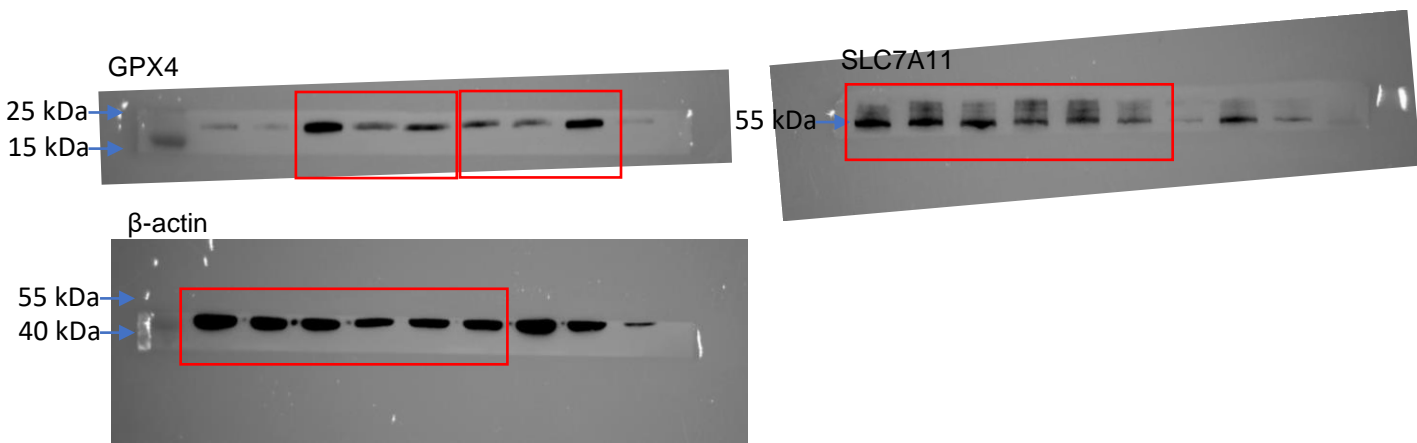

Fig. 6K

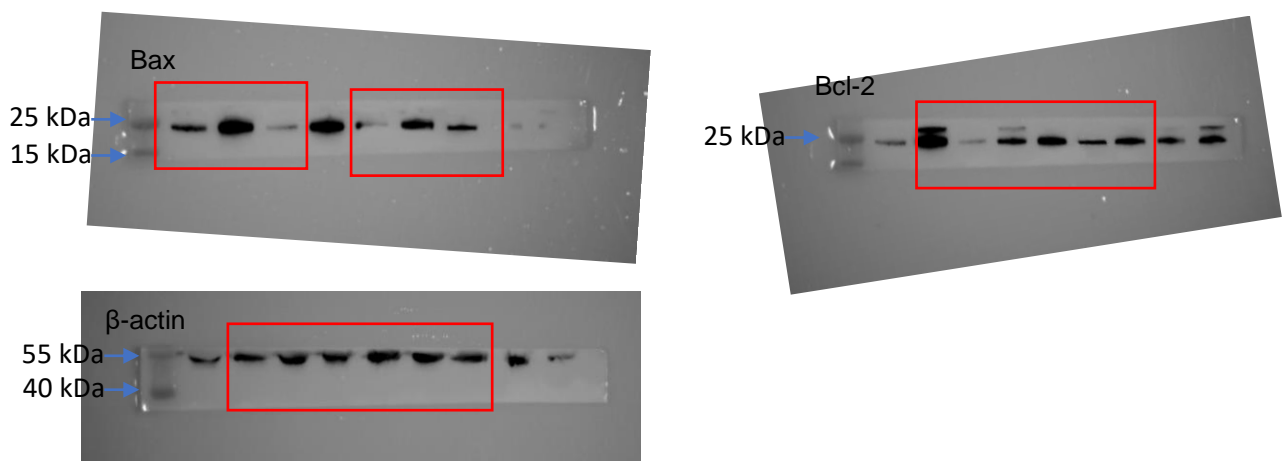

Fig. 7C

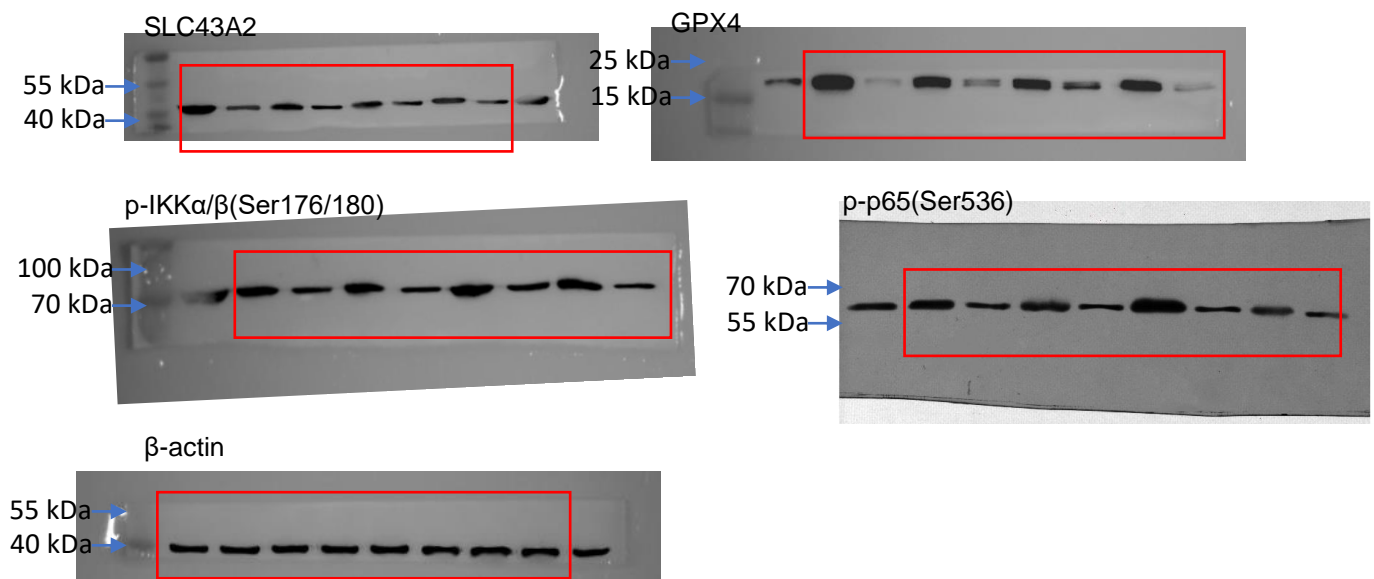

Supplement: 41419_2023_5860_MOESM7_ESM.pdf [file 41419_2023_5860_MOESM7_ESM.pdf]
